# Supplementary material for: SNARE Proteins LjVAMP72a and LjVAMP72b Are Required for Root Symbiosis and Root Hair Formation in Lotus japonicus
Source: Front Plant Sci. 2019 Jan 16;9:1992. doi: 10.3389/fpls.2018.01992 (PMC6343493; doi:10.3389/fpls.2018.01992)
Supplement: Supplementary file 1 [file Table_1.XLSX]

## Sheet: Genomes used
TABLE S1 Genome data source used in this study
Genus	Specific epithet	Genome version	Data type	Source
Alnus	glutinosa	v1	Genome	(Griesmann et al., 2018)
Amaranthus	hypochondriacus	v1.0	Genome	Phytozome v12 (Goodstein et al., 2012)
Amborella	trichopoda	v1.0	Genome	Phytozome v12 (Goodstein et al., 2012)
Ananas	comosus	v3	Genome	Phytozome v12 (Goodstein et al., 2012)
Aquilegia	coerulea	v3.1	Genome	Phytozome v12 (Goodstein et al., 2012)
Arabidopsis	halleri	v1.1	Genome	Phytozome v12 (Goodstein et al., 2012)
Arabidopsis	lyrata	v2.1	Genome	Phytozome v12 (Goodstein et al., 2012)
Arabidopsis	thaliana	TAIR10	Genome	Phytozome v12 (Goodstein et al., 2012)
Arachis	duranensis	v1.0	Genome	PeanutBase (Dash et al.,2016)
Begonia	fuchsioides	v1	Genome	(Griesmann et al., 2018)
Boechera	stricta	v1.2	Genome	Phytozome v12 (Goodstein et al., 2012)
Brachypodium	distachyon	v3.1	Genome	Phytozome v12 (Goodstein et al., 2012)
Brachypodium	stacei	v1.1	Genome	Phytozome v12 (Goodstein et al., 2012)
Brassica	oleracea	v1.0	Genome	Phytozome v12 (Goodstein et al., 2012)
Brassica	rapa	v1.3	Genome	Phytozome v12 (Goodstein et al., 2012)
Capsella	grandiflora	v1.1	Genome	Phytozome v12 (Goodstein et al., 2012)
Capsella	rubella	v1.0	Genome	Phytozome v12 (Goodstein et al., 2012)
Carica	papaya	ASGPBv0.4	Genome	Phytozome v12 (Goodstein et al., 2012)
Casuarina	glauca	v1	Genome	(Griesmann et al., 2018)
Ceanothus	thyrsiflorus	v1.0	Transcriptome	(Battenberg et al., 2018)
Cercis	canadensis	v1	Genome	(Griesmann et al., 2018)
Chamaecrista	fasciculata	v1	Genome	(Griesmann et al., 2018)
Citrus	clementina	v1.0	Genome	Phytozome v12 (Goodstein et al., 2012)
Citrus	sinensis	v1.1	Genome	Phytozome v12 (Goodstein et al., 2012)
Cucumis	sativus	v1.0	Genome	Phytozome v12 (Goodstein et al., 2012)
Datisca	glomerata	v1	Genome	(Griesmann et al., 2018)
Daucus	carota	v2.0	Genome	Phytozome v12 (Goodstein et al., 2012)
Discaria	trinervis	v1	Genome	(Griesmann et al., 2018)
Dryas	drummondii	v1	Genome	(Griesmann et al., 2018)
Dunaliella	salina	v1.0	Genome	Phytozome v12 (Goodstein et al., 2012)
Eucalyptus	grandis	v2.0	Genome	Phytozome v12 (Goodstein et al., 2012)
Eutrema	salsugineum	v1.0	Genome	Phytozome v12 (Goodstein et al., 2012)
Fragaria	vesca	v1.1	Genome	Phytozome v12 (Goodstein et al., 2012)
Glycine	max	Wm82.a2.v1	Genome	Phytozome v12 (Goodstein et al., 2012)
Gossypium	raimondii	v2.1	Genome	Phytozome v12 (Goodstein et al., 2012)
Kalanchoe	fedtschenkoi	v1.1	Genome	Phytozome v12 (Goodstein et al., 2012)
Kalanchoe	laxiflora	v1.1	Genome	Phytozome v12 (Goodstein et al., 2012)
Linum	usitatissimum	v1.0	Genome	Phytozome v12 (Goodstein et al., 2012)
Lotus	japonicus	v3.0	Genome	Miyakogusa.jp (Sato et al., 2008)
Malus	domestica	v1.0	Genome	Phytozome v12 (Goodstein et al., 2012)
Manihot	esculenta	v6.1	Genome	Phytozome v12 (Goodstein et al., 2012)
Marchantia	polymorpha	v3.1	Genome	Phytozome v12 (Goodstein et al., 2012)
Medicago	truncatula	Mt4.0v1	Genome	Phytozome v12 (Goodstein et al., 2012)
Mimosa	pudica	v1	Genome	(Griesmann et al., 2018)
Mimulus	guttatus	v2.0	Genome	Phytozome v12 (Goodstein et al., 2012)
Musa	acuminata	v1	Genome	Phytozome v12 (Goodstein et al., 2012)
Nissolia	schottii	v1	Genome	(Griesmann et al., 2018)
Oropetium	thomaeum	v1.0	Genome	Phytozome v12 (Goodstein et al., 2012)
Oryza	sativa	v7.0	Genome	Phytozome v12 (Goodstein et al., 2012)
Panicum	hallii	v2.0	Genome	Phytozome v12 (Goodstein et al., 2012)
Panicum	virgatum	v1.1	Genome	Phytozome v12 (Goodstein et al., 2012)
Phaseolus	vulgaris	v2.1	Genome	Phytozome v12 (Goodstein et al., 2012)
Physcomitrella	patens	v3.3	Genome	Phytozome v12 (Goodstein et al., 2012)
Populus	trichocarpa	v3.0	Genome	Phytozome v12 (Goodstein et al., 2012)
Prunus	persica	v2.1	Genome	Phytozome v12 (Goodstein et al., 2012)
Ricinus	communis	v0.1	Genome	Phytozome v12 (Goodstein et al., 2012)
Salix	purpurea	v1.0	Genome	Phytozome v12 (Goodstein et al., 2012)
Selaginella	moellendorffii	v1.0	Genome	Phytozome v12 (Goodstein et al., 2012)
Setaria	italica	v2.2	Genome	Phytozome v12 (Goodstein et al., 2012)
Setaria	viridis	v1.1	Genome	Phytozome v12 (Goodstein et al., 2012)
Solanum	lycopersicum	ITAG2.4	Genome	Phytozome v12 (Goodstein et al., 2012)
Solanum	tuberosum	v4.03	Genome	Phytozome v12 (Goodstein et al., 2012)
Sorghum	bicolor	v3.1.1	Genome	Phytozome v12 (Goodstein et al., 2012)
Sphagnum	fallax	v0.5	Genome	Phytozome v12 (Goodstein et al., 2012)
Spirodela	polyrhiza	v2	Genome	Phytozome v12 (Goodstein et al., 2012)
Theobroma	cacao	v1.1	Genome	Phytozome v12 (Goodstein et al., 2012)
Trifolium	pratense	v2	Genome	Phytozome v12 (Goodstein et al., 2012)
Vitis	vinifera	Genoscope.12X	Genome	Phytozome v12 (Goodstein et al., 2012)
Zea	mays	Ensembl-18	Genome	Phytozome v12 (Goodstein et al., 2012)
Zostera	marina	v2.2	Genome	Phytozome v12 (Goodstein et al., 2012)
