# Supplementary material for: SNARE Proteins LjVAMP72a and LjVAMP72b Are Required for Root Symbiosis and Root Hair Formation in Lotus japonicus
Source: Front Plant Sci. 2019 Jan 16;9:1992. doi: 10.3389/fpls.2018.01992 (PMC6343493; doi:10.3389/fpls.2018.01992)
Supplement: Supplementary file 2 [file Table_2.XLSX]

## Sheet: Table S2
TABLE S2	Sequences used in phylogenic and alingment analysises
Species	Gene name	Gene ID*
Arabidopsis thaliana	AtVAMP721	AT1G04750
	AtVAMP722	AT2G33120
	AtVAMP723	AT2G33110
	AtVAMP724	AT4G15780
	AtVAMP725	AT2G32670
	AtVAMP726	AT1G04760
	AtVAMP727	AT3G54300
Glycine max	GmVAMP72a	Glyma.07G223000_1
	GmVAMP72c	Glyma.08G355600_1
	GmVAMP72d	Glyma.09G019800_1
	GmVAMP72f	Glyma.10G123500_2
	GmVAMP72h	Glyma.15G126200_1
	GmVAMP72i	Glyma.15G147200_1
	GmVAMP72l	Glyma.18G172300_1
	GmVAMP72m	Glyma.20G022200_1
	GmVAMP72n	Glyma.20G076200_1
Lotus japonicus	LjVAMP72a	Lj6g3v1692680_1
	LjVAMP72b	Lj4g3v0667970_1
	LjVAMP72c	Lj6g3v0132830_1
	LjVAMP72d	Lj1g3v3478250_1
	LjVAMP72e	Lj0g3v0142149_1
	LjVAMP72f	Lj0g3v0321629_1
	LjVAMP724	Lj6g3v1444530_1
	LjVAMP727	Lj5g3v2237620_1
Medicago truncatula	MtVAMP721a	Medtr4g022570_1
	MtVAMP721b	Medtr7g058900_1
	MtVAMP721c	Medtr7g058640_1
	MtVAMP721d	Medtr2g028790_1
	MtVAMP721e	Medtr4g083490_1
	MtVAMP721f	Medtr1g047710_1
	MtVAMP721g	Medtr1g047720_1
	MtVAMP724	Medtr2g436870_1
	MtVAMP727	Medtr1g111890_1
Populus trichocarpa	PtVAMP72a	Potri.001G050400_1
	PtVAMP72b	Potri.002G240900_1
	PtVAMP72e	Potri.010G239900_1
	PtVAMP72f	Potri.012G119600_1
	PtVAMP72g	Potri.015G118300_1
	PtVAMP72j	Potri.003G177700_1
	PtVAMP724	Potri.008G209100_1
	PtVAMP727	Potri.008G019400_1
Solanum lycopersicum	SlVAMP72a	Solyc02g069150.2
	SlVAMP72b	Solyc09g091610.2
	SlVAMP72c	Solyc09g061620.2
	SlVAMP72d	Solyc06g083530.2
	SlVAMP72e	Solyc12g098180.1
	SlVAMP724	Solyc01g066940.2
	SlVAMP727	Solyc11g006780.1
Vitis vinifera	VvVAMP72a	GSVIVG01000524001
	VvVAMP72b	GSVIVG01010710001
	VvVAMP72c	GSVIVG01012100001
	VvVAMP72e	GSVIVG01028579001
	VvVAMP724	GSVIVG01017751001
* Accesstion numbers are presented according to the database in TABLE S1
